# Supplementary material for: 1,4-Naphthoquinone Motif in the Synthesis of New Thiopyrano[2,3-d]thiazoles as Potential Biologically Active Compounds
Source: MDPI journal article supplement (doi:10.3390/molecules27217575), 2022-11-04
Supplement: s1 [file s1]

## Supplementary information

### Table of Contents

|                                                                                                          |         |
|----------------------------------------------------------------------------------------------------------|---------|
| Copies of $^1\text{H}$ and $^{13}\text{C}$ NMR spectra of thiopyrano[2,3- <i>d</i> ]thiazole derivatives | S1-S12  |
| NCI protocols for compounds <b>3.5</b> and <b>3.6</b>                                                    | S13-S14 |

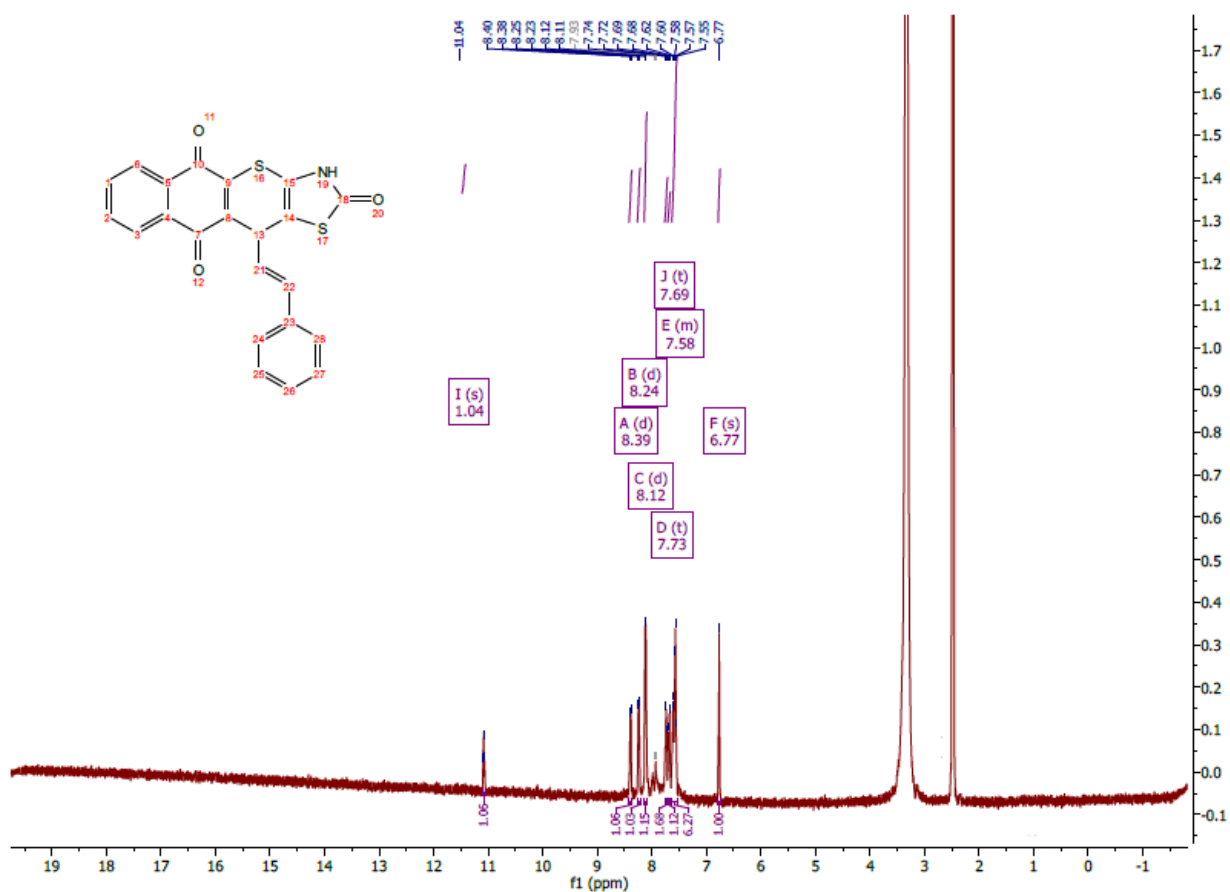

Figure S1.  $^1\text{H}$  NMR Spectrum of compound **3.1**.

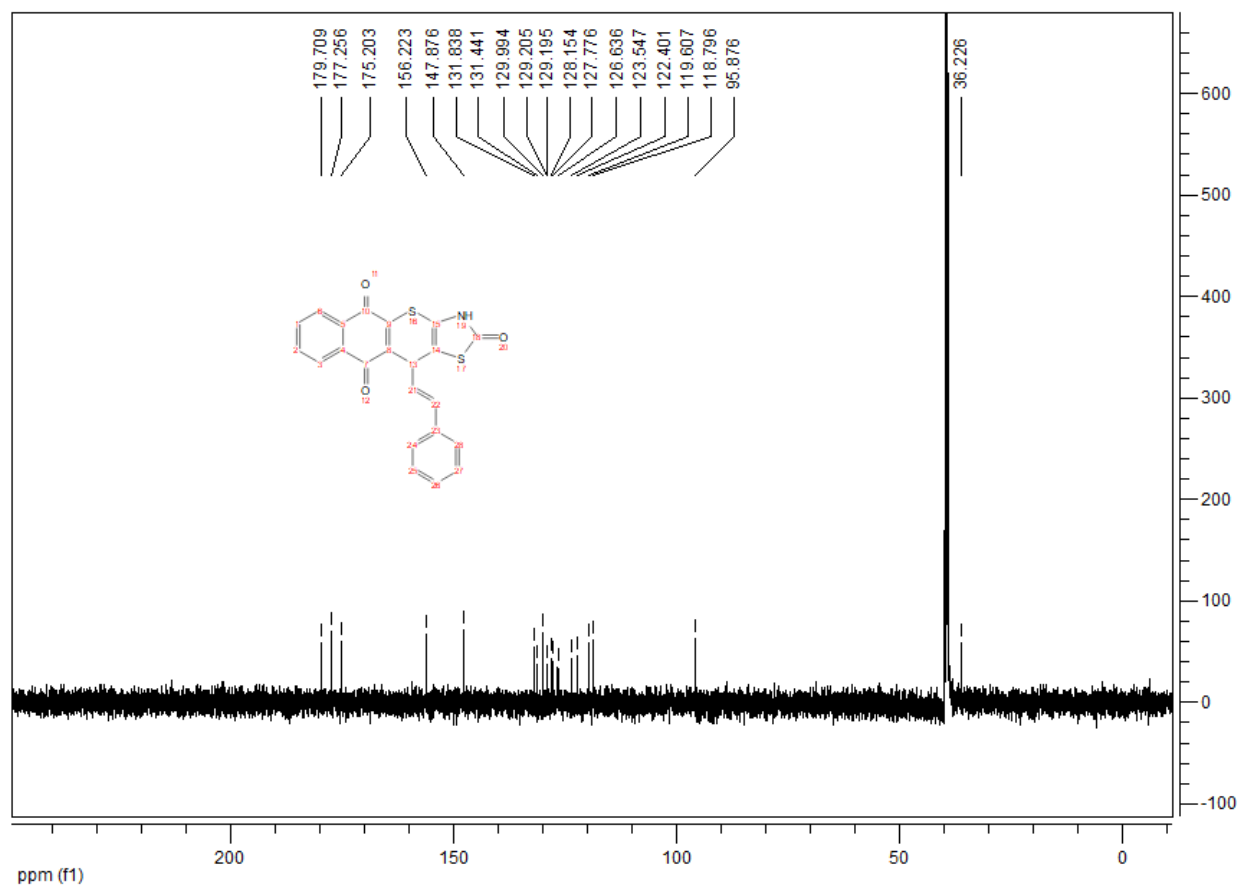

Figure S2.  $^{13}\text{C}$  NMR Spectrum of compound **3.1**.

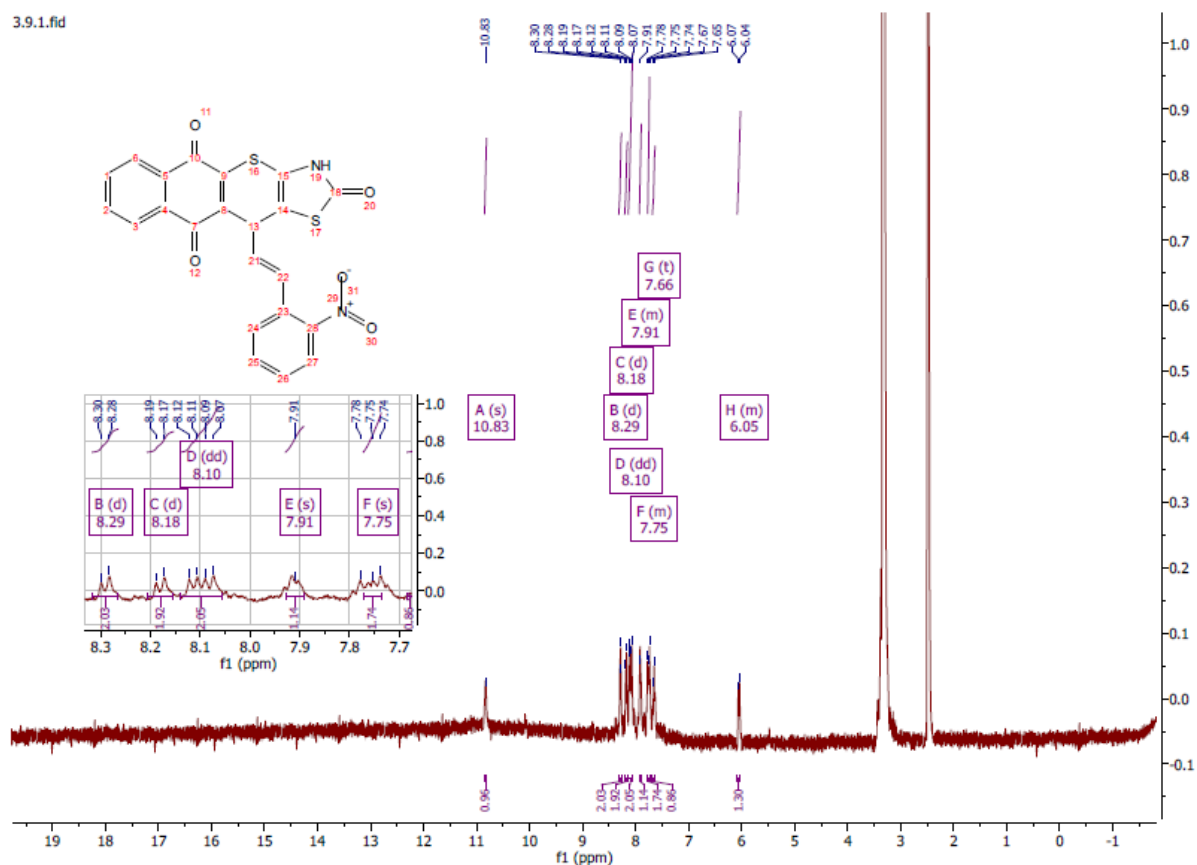

Figure S3.  $^1\text{H}$  NMR Spectrum of compound **3.2**.

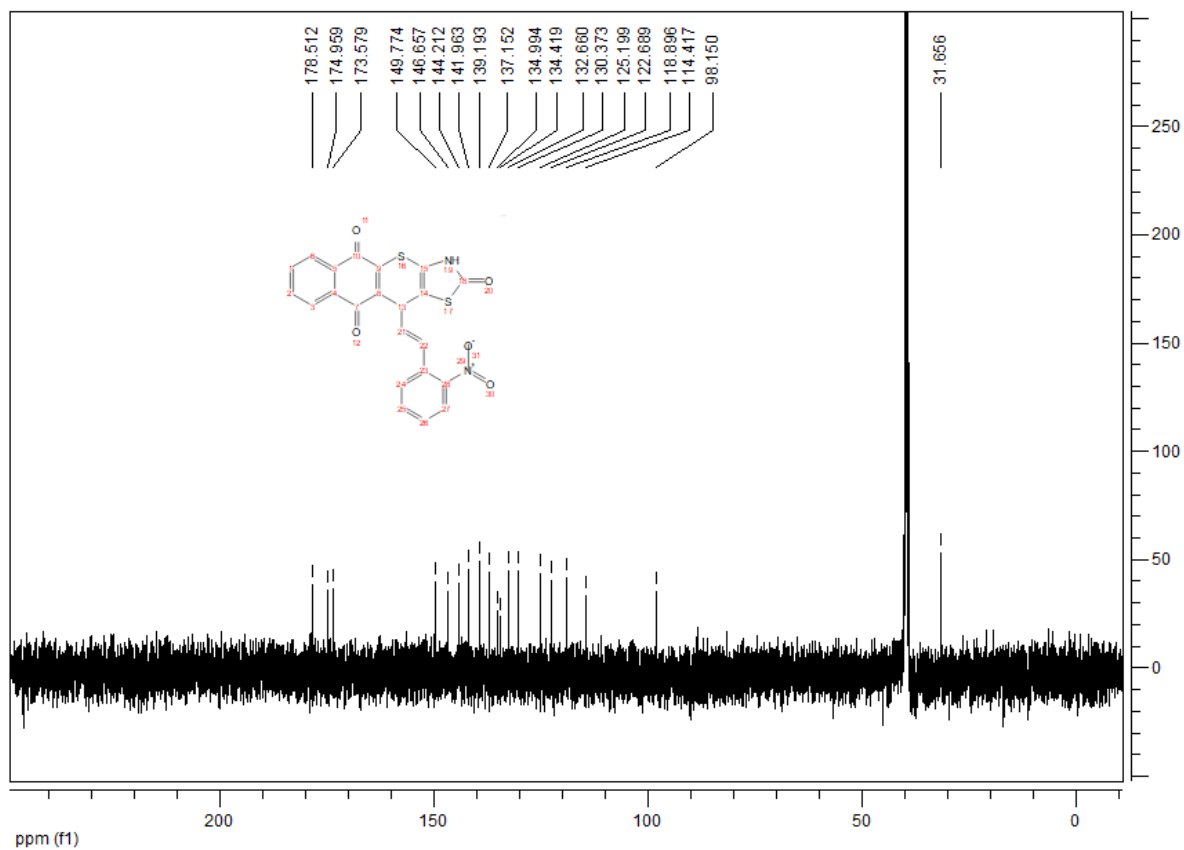

Figure S4.  $^{13}\text{C}$  NMR Spectrum of compound **3.2**.

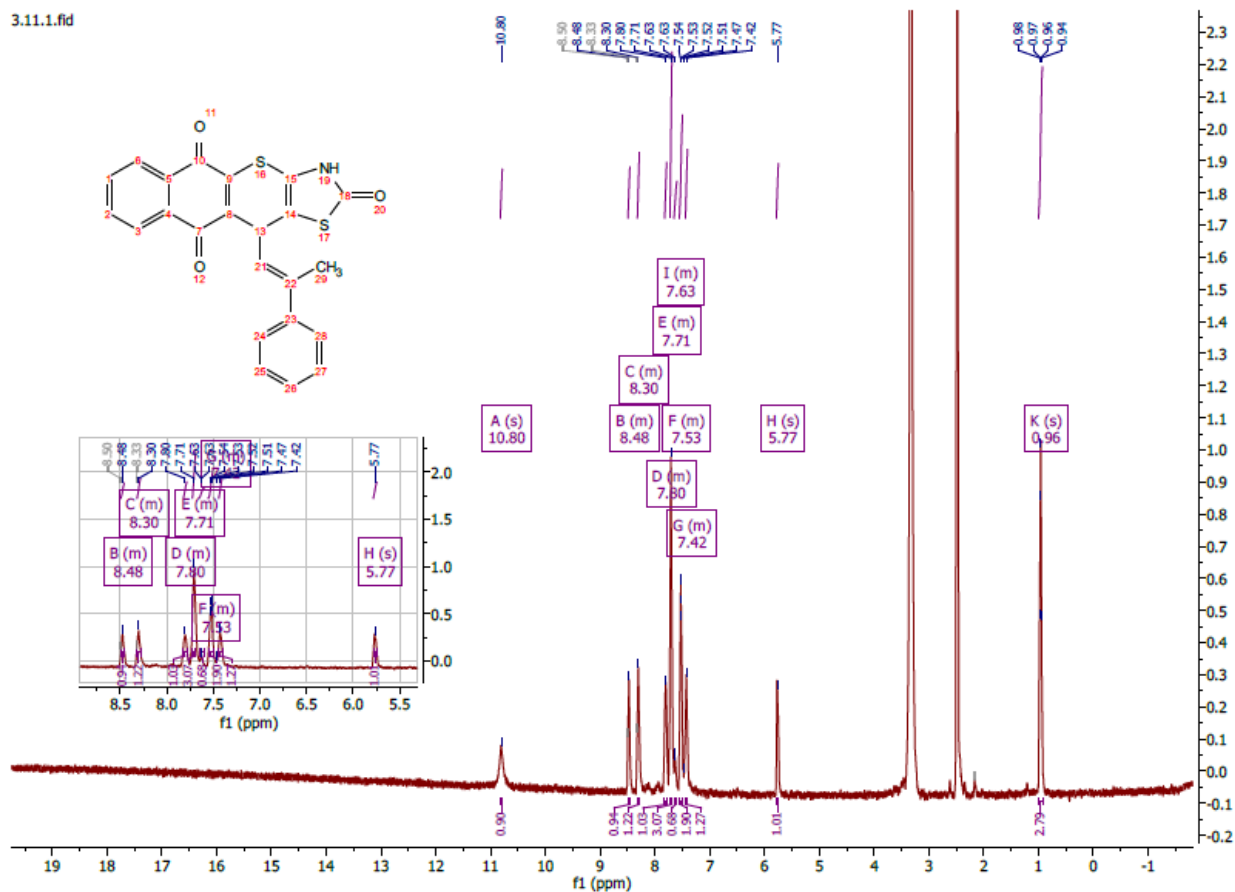

Figure S5  $^1\text{H}$  NMR Spectrum of compound **3.3**.

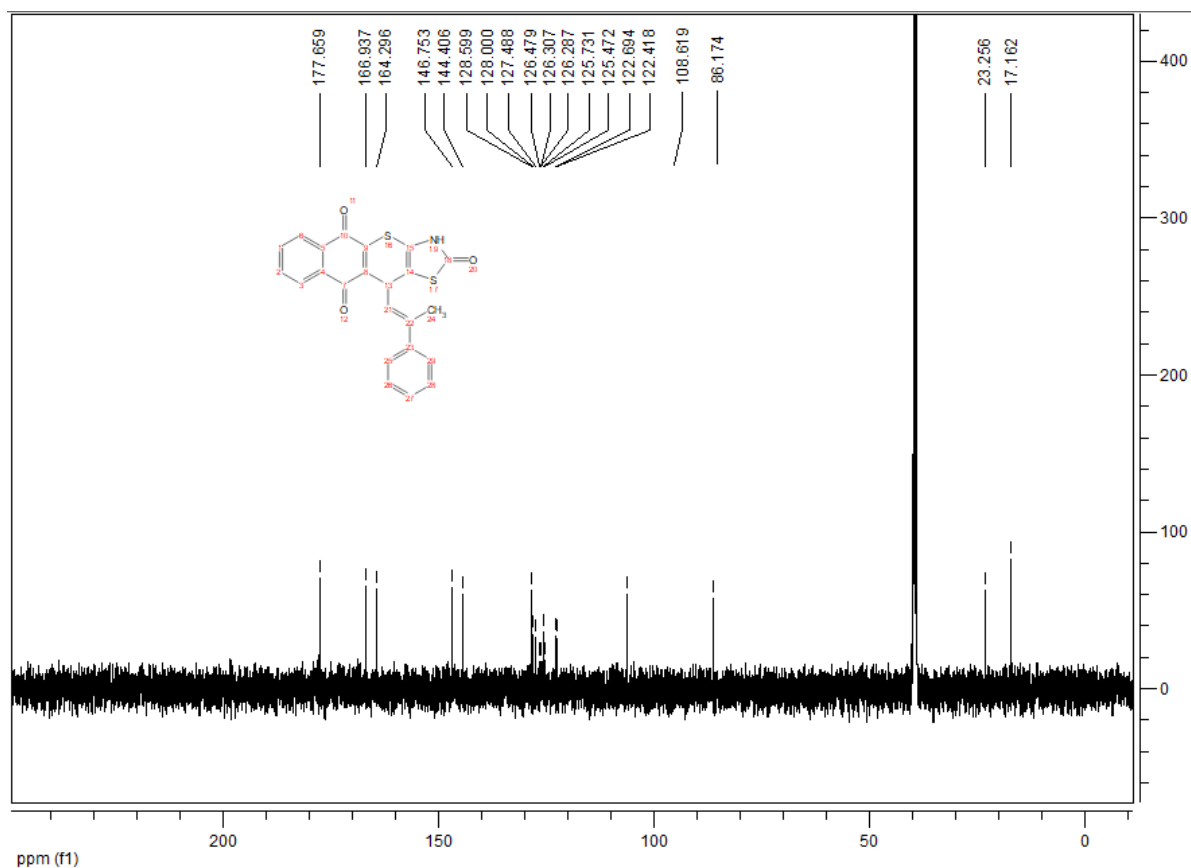

Figure S6.  $^{13}\text{C}$  NMR Spectrum of compound **3.3**.

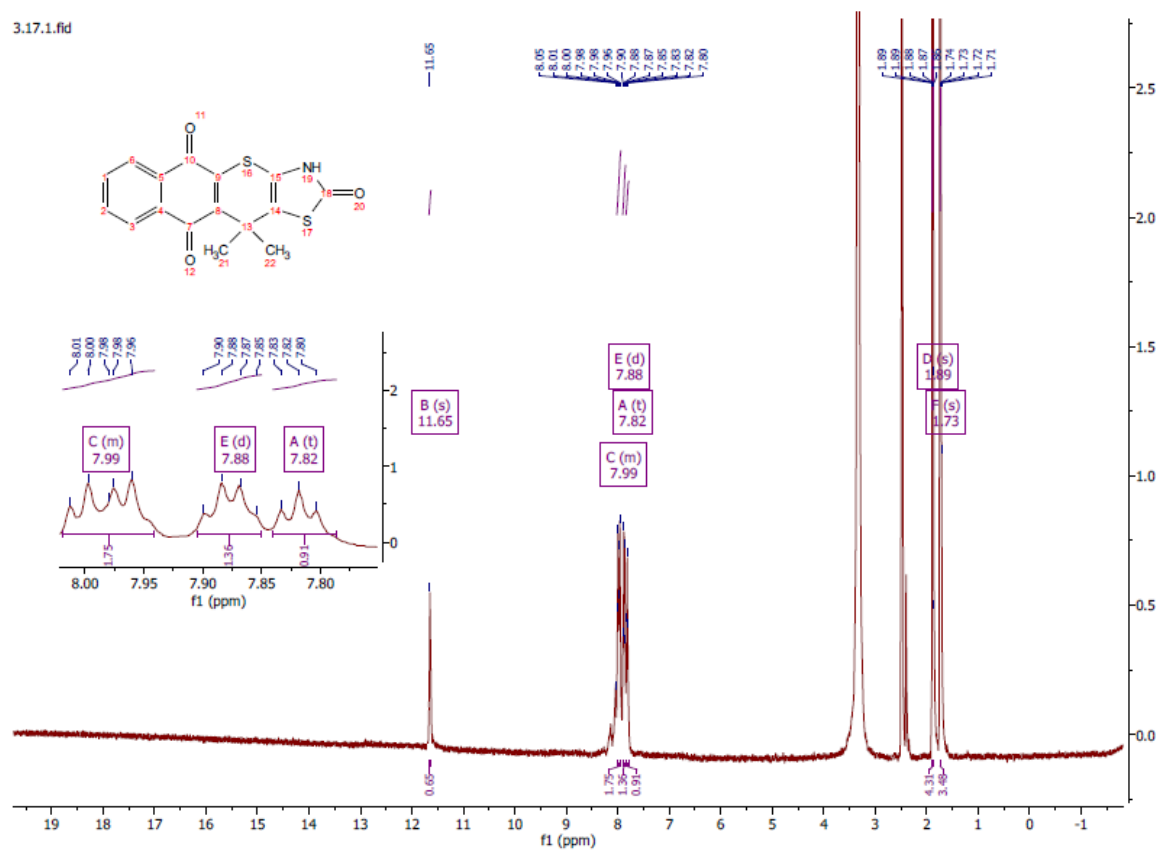

Figure S7.  $^1\text{H}$  NMR Spectrum of compound **3.4**.

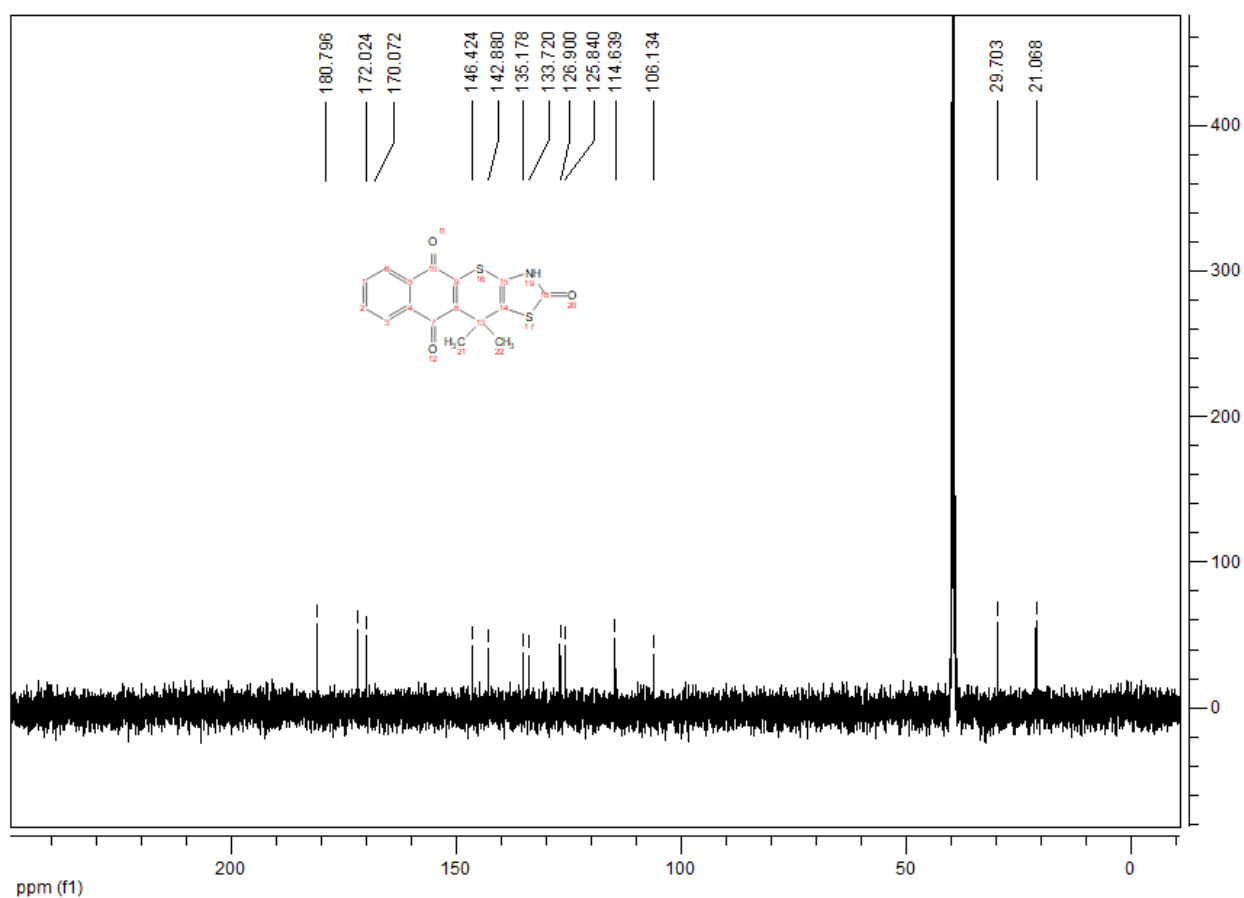

Figure S8.  $^{13}\text{C}$  NMR Spectrum of compound **3.4**.

3.19.1.fid

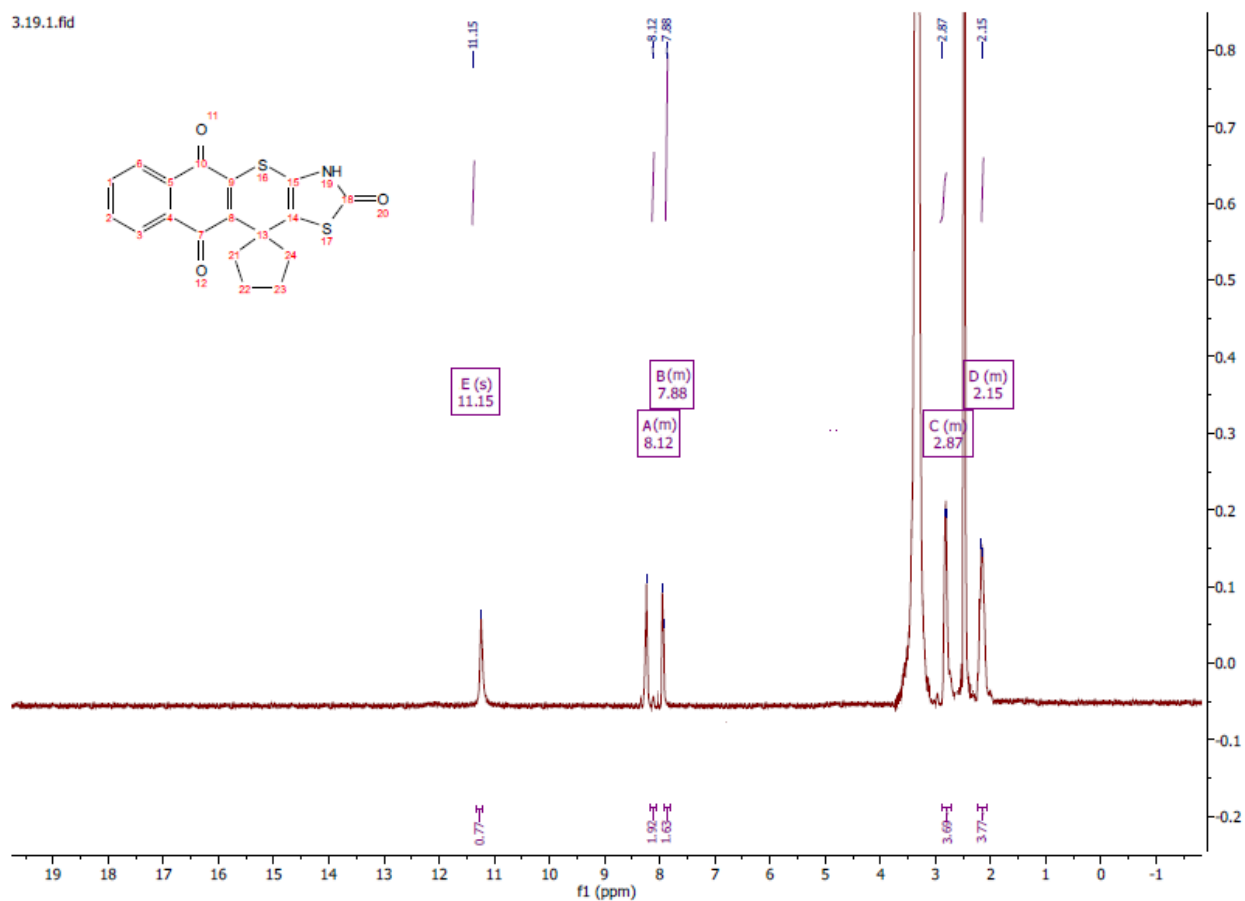

Figure S9.  $^1\text{H}$  NMR Spectrum of compound 3.5.

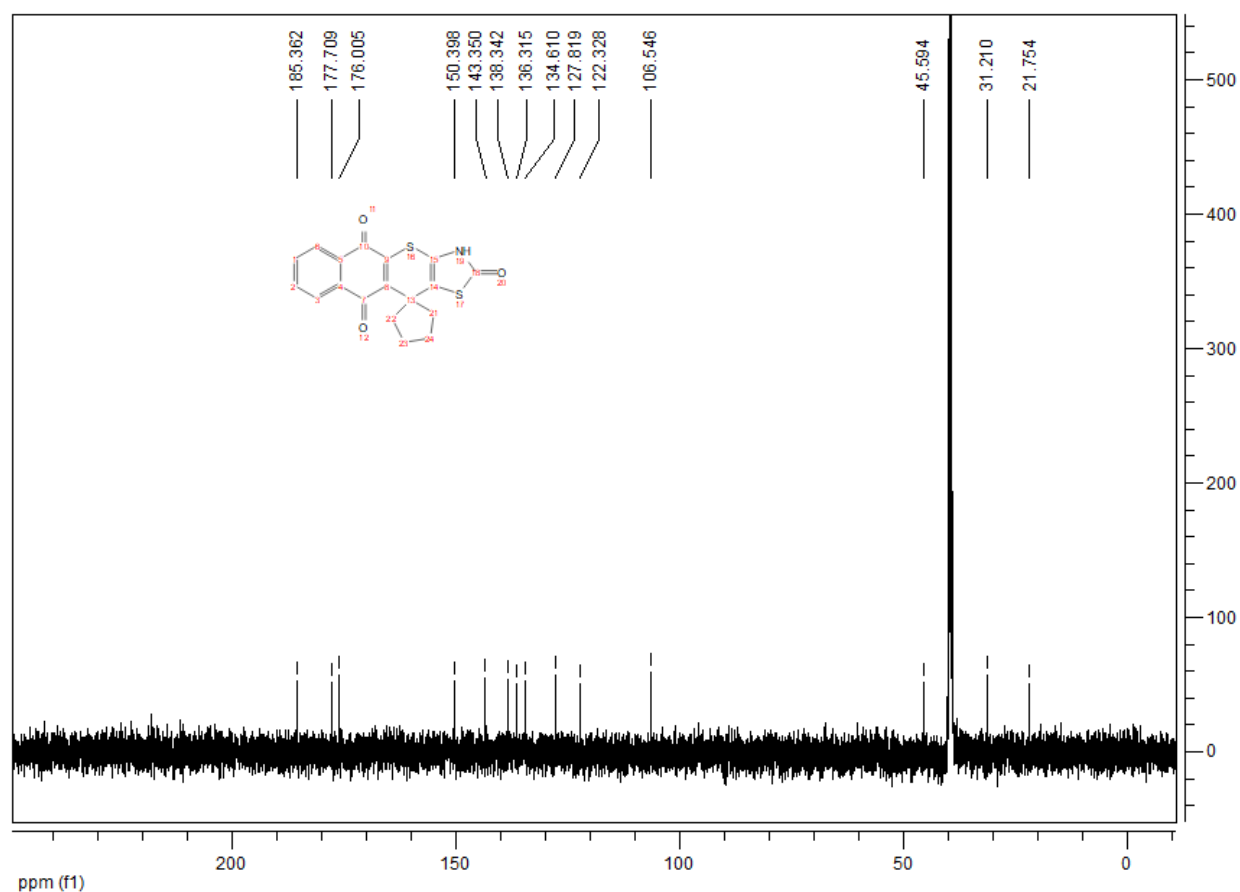

Figure S10.  $^{13}\text{C}$  NMR Spectrum of compound 3.5.

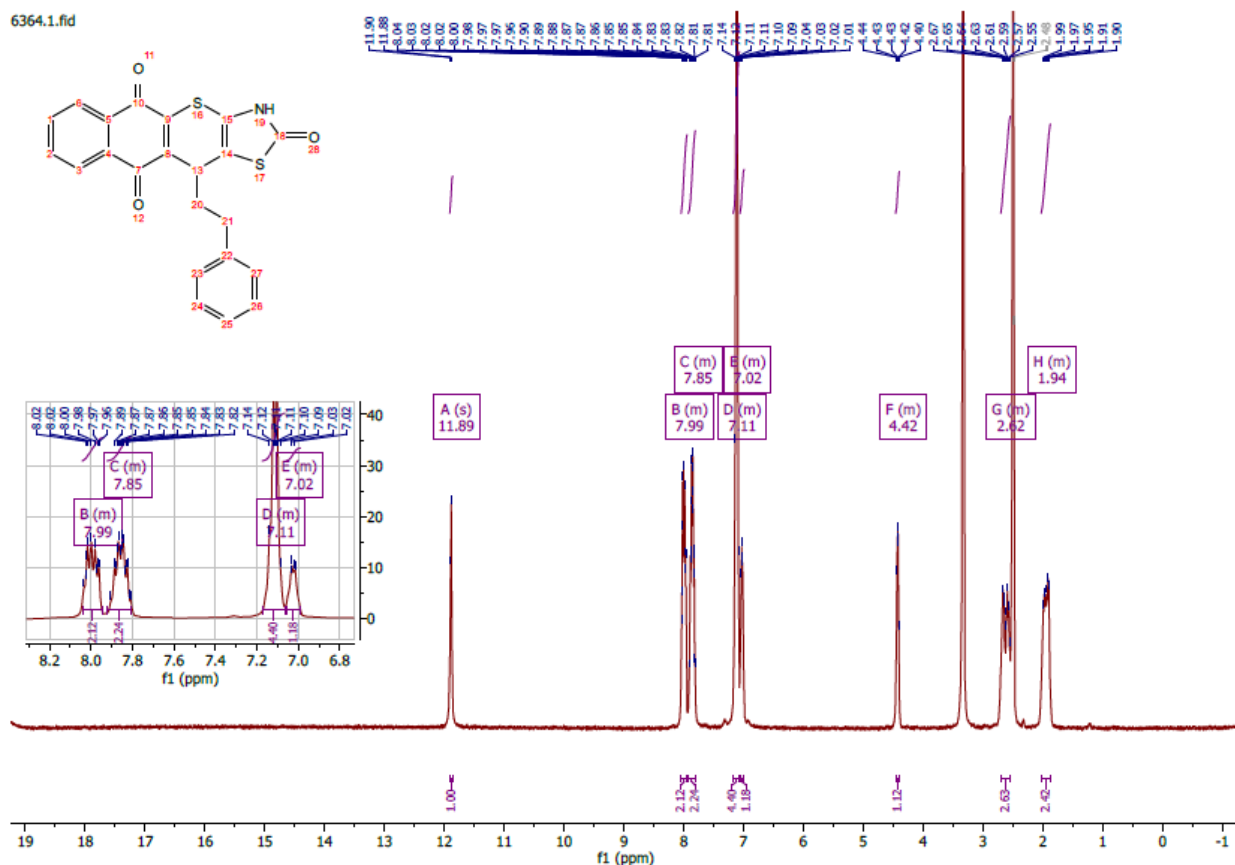

Figure S11. <sup>1</sup>H NMR Spectrum of compound **3.6**.

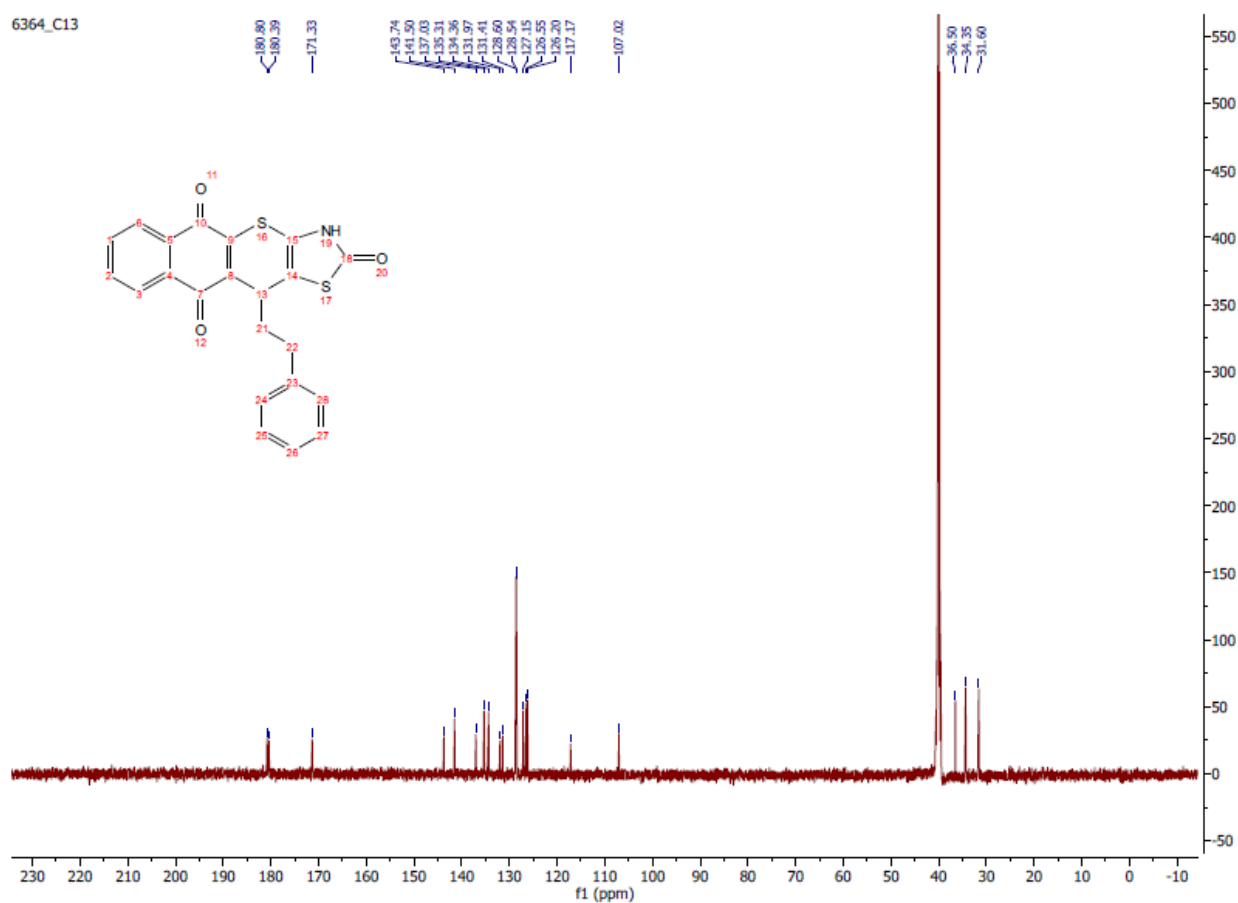

Figure S12. <sup>13</sup>C NMR Spectrum of compound **3.6**.

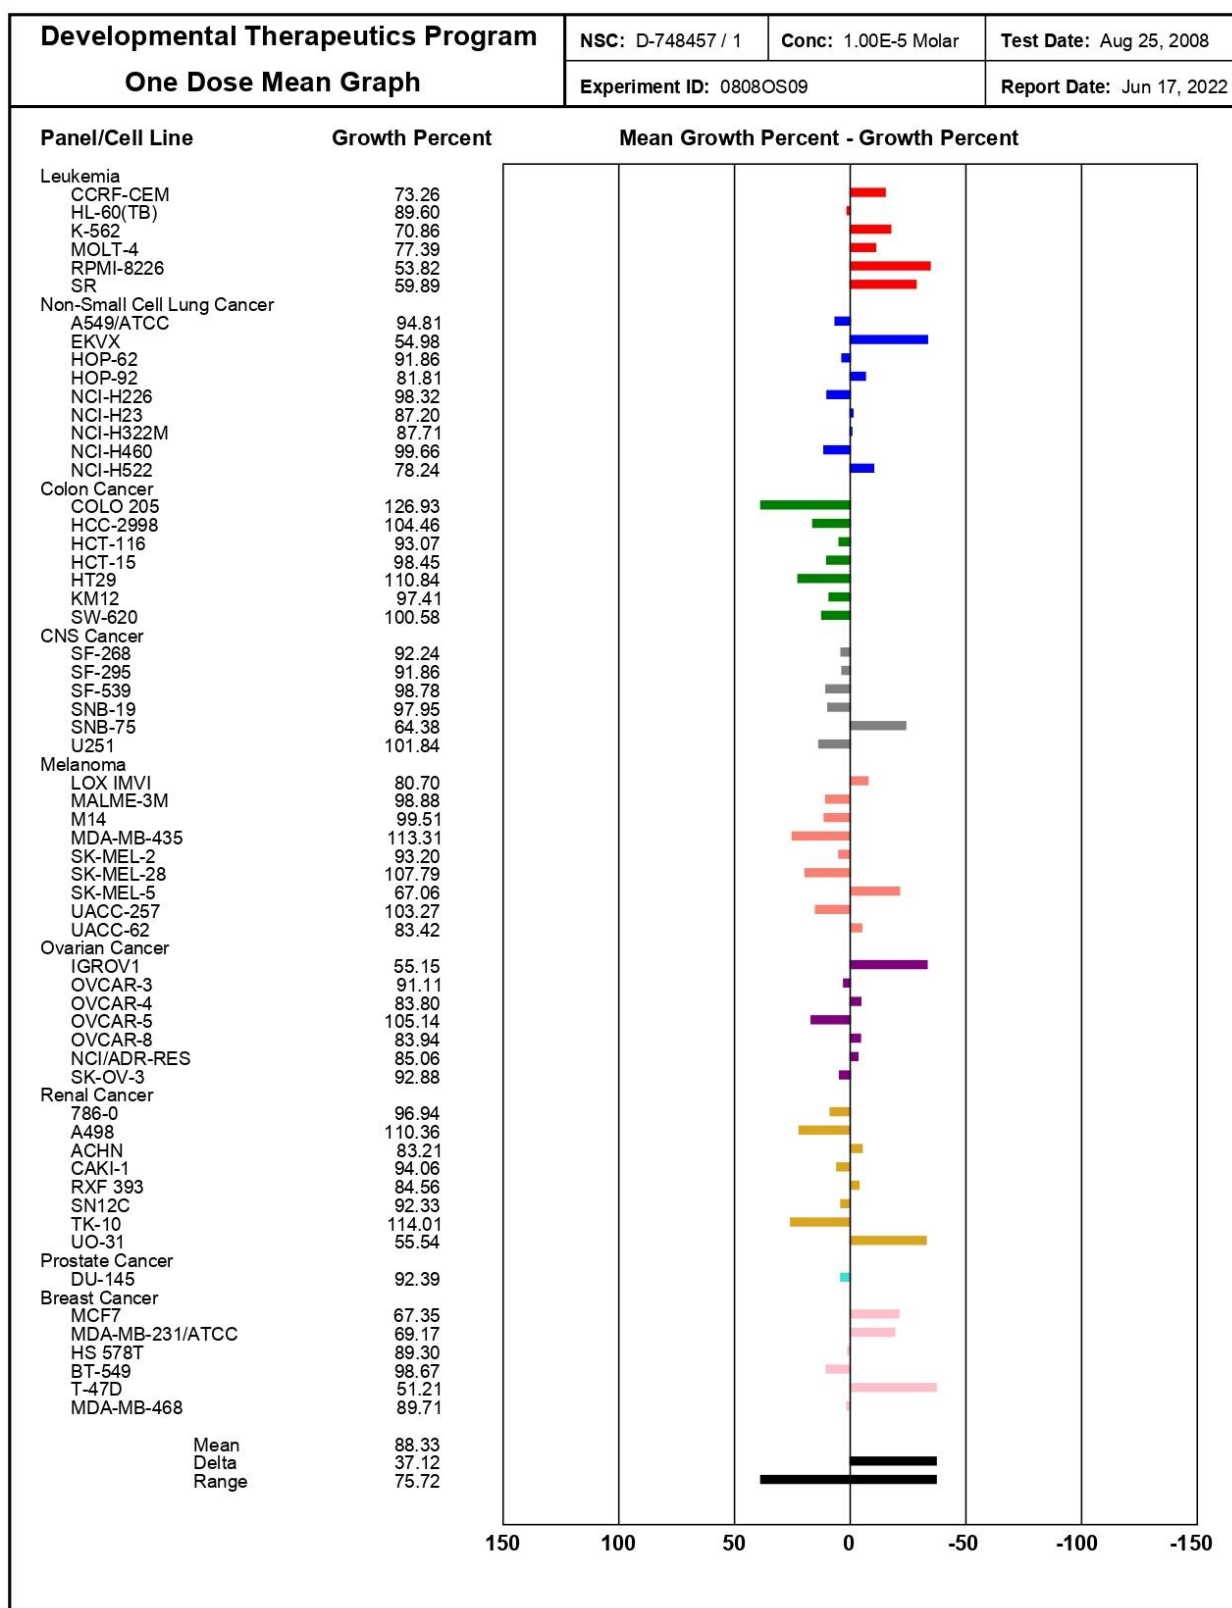

Figure S13. NCI-60 cell lines screening protocol in concentration 10  $\mu$ M for compound **3.5**.



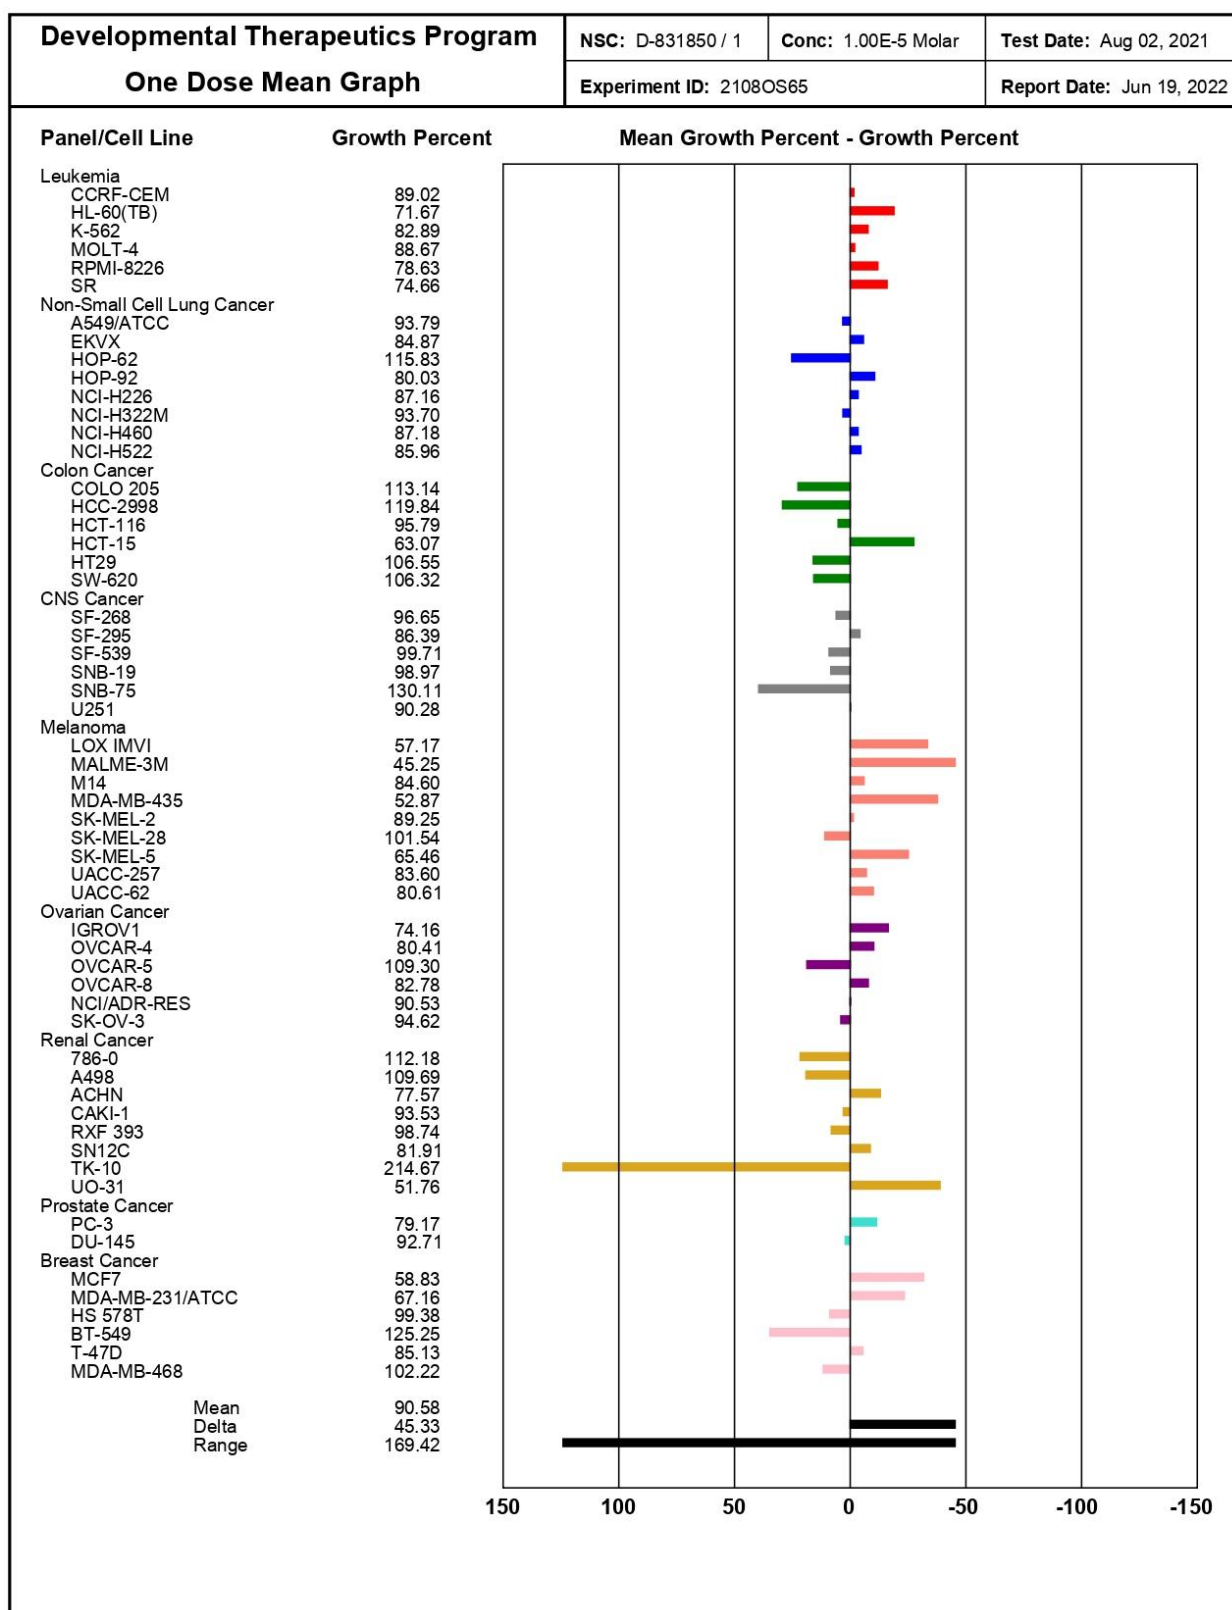

Figure S14. NCI-60 cell lines screening protocol in concentration 10  $\mu$ M for compound **3.6**.
